# Supplementary material
Source: publisher figshare collection journal article supplement (https://acs.figshare.com/ndownloader/files/3819265)
Supplement: Supplementary file 1 [file 3819265]

# Supporting information

## Linear–Dendritic Copolymer Composed of Polyethylene Glycol and All-trans-Retinoic Acid as Drug Delivery Platform for Paclitaxel against Breast Cancer

Jianfeng Li,<sup>†</sup> Xutao Jiang,<sup>†</sup> Yubo Guo,<sup>†</sup> Sai An,<sup>†</sup> Yuyang Kuang,<sup>†</sup> Haojun Ma,<sup>†</sup> Xi He,<sup>†</sup> and Chen Jiang<sup>\*,†,‡</sup>

<sup>†</sup>Key Laboratory of Smart Drug Delivery (Fudan University), Ministry of Education, Department of Pharmaceutics, School of Pharmacy, Fudan University, 826 Zhangheng Road, Shanghai 201203, China

<sup>‡</sup>State Key Laboratory of Medical Neurobiology, Fudan University, Shanghai 201203, China

### Table of Contents

|                                                                     |    |
|---------------------------------------------------------------------|----|
| <sup>1</sup> H NMR and MALDI-TOF MS of PEG-G3-OH <sub>8</sub> ..... | S2 |
| <sup>1</sup> H NMR and MALDI-TOF MS of PEG-G3-RA <sub>8</sub> ..... | S3 |
| Optimization of Micelle Formulation.....                            | S4 |
| In Vitro PTX Release Profiles .....                                 | S5 |
| The Stability of PEG-G3-RA <sub>8</sub> /PTX Micelles .....         | S6 |
| The Cytotoxicity of ATRA and PEG-G3-RA <sub>8</sub> .....           | S7 |
| In Vivo Apoptosis .....                                             | S8 |
| Histological Analysis of Main Organs .....                          | S9 |

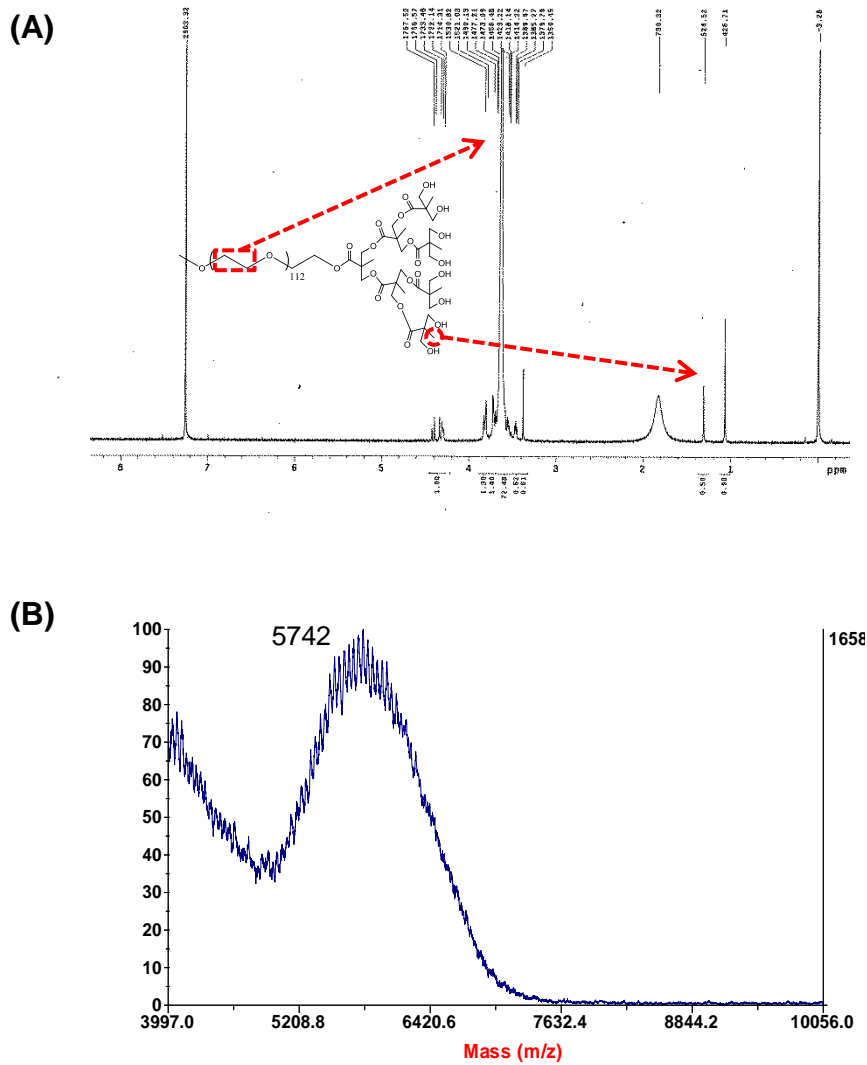

Figure S1. (A)  $^1\text{H}$  NMR of PEG-G3- $\text{OH}_8$ . (B) The MALDI-TOF MS of PEG-G3- $\text{OH}_8$ .

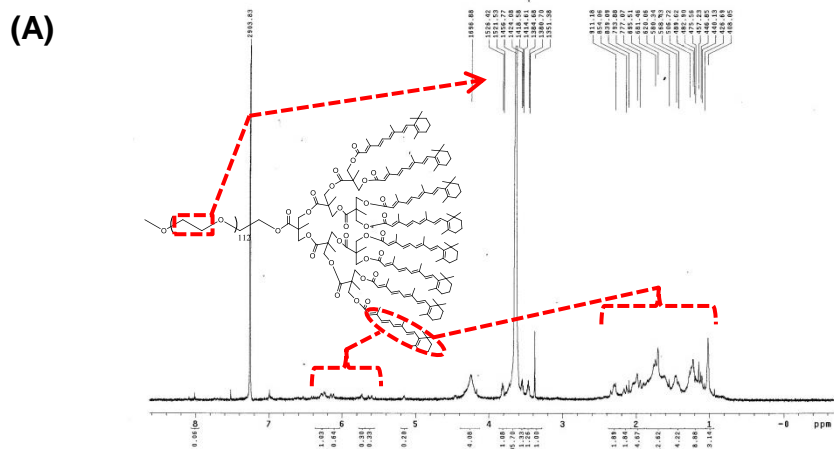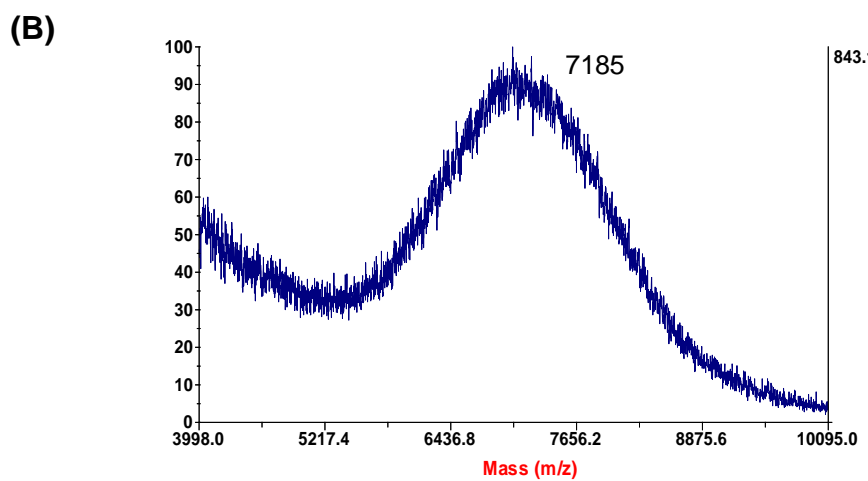

Figure S2. (A) <sup>1</sup>H NMR of PEG-G3-RA<sub>8</sub>. (B) The MALDI-TOF MS of PEG-G3-RA<sub>8</sub>.

10

**Z-Average (d.nm):** 28.36  
**PDI:** 0.141  
**Intercept:** 0.931  
**Result quality:** Good

|         | Size (d.nm) | % Intensity | Width (d.nm) |
|---------|-------------|-------------|--------------|
| Peak 1: | 31.42       | 100.0       | 11.09        |
| Peak 2: | 0.000       | 0.0         | 0.000        |
| Peak 3: | 0.000       | 0.0         | 0.000        |

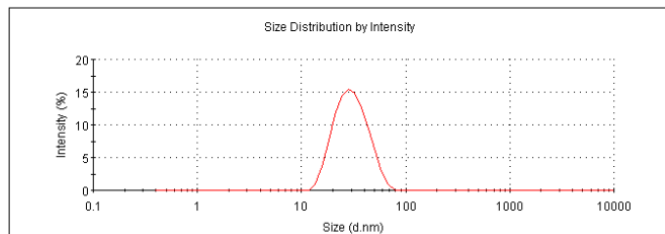

40

**Z-Average (d.nm):** 29.41  
**PDI:** 0.179  
**Intercept:** 0.934  
**Result quality:** Good

|         | Size (d.nm) | % Intensity | Width (d.nm) |
|---------|-------------|-------------|--------------|
| Peak 1: | 31.40       | 97.1        | 10.56        |
| Peak 2: | 4478        | 2.9         | 887.1        |
| Peak 3: | 0.000       | 0.0         | 0.000        |

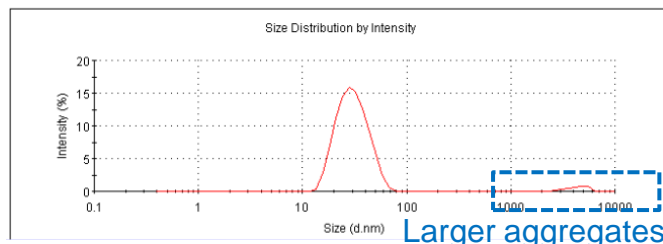

20

**Z-Average (d.nm):** 28.45  
**PDI:** 0.134  
**Intercept:** 0.940  
**Result quality:** Good

|         | Size (d.nm) | % Intensity | Width (d.nm) |
|---------|-------------|-------------|--------------|
| Peak 1: | 32.46       | 100.0       | 12.52        |
| Peak 2: | 0.000       | 0.0         | 0.000        |
| Peak 3: | 0.000       | 0.0         | 0.000        |

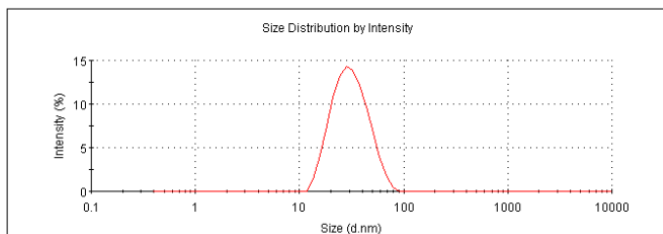

50

**Z-Average (d.nm):** 32.53  
**PDI:** 0.282  
**Intercept:** 0.929  
**Result quality:** Good

|         | Size (d.nm) | % Intensity | Width (d.nm) |
|---------|-------------|-------------|--------------|
| Peak 1: | 31.48       | 91.2        | 10.67        |
| Peak 2: | 302.5       | 5.9         | 92.11        |
| Peak 3: | 5057        | 2.9         | 578.1        |

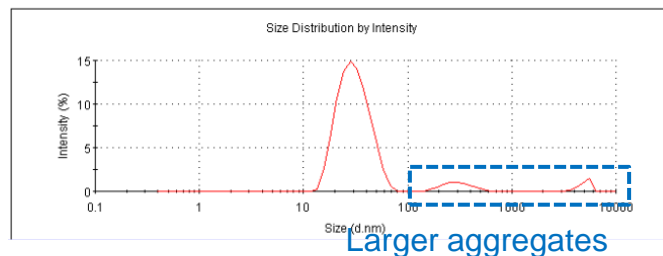

30

**Z-Average (d.nm):** 27.64  
**PDI:** 0.103  
**Intercept:** 0.936  
**Result quality:** Good

|         | Size (d.nm) | % Intensity | Width (d.nm) |
|---------|-------------|-------------|--------------|
| Peak 1: | 30.91       | 100.0       | 10.61        |
| Peak 2: | 0.000       | 0.0         | 0.000        |
| Peak 3: | 0.000       | 0.0         | 0.000        |

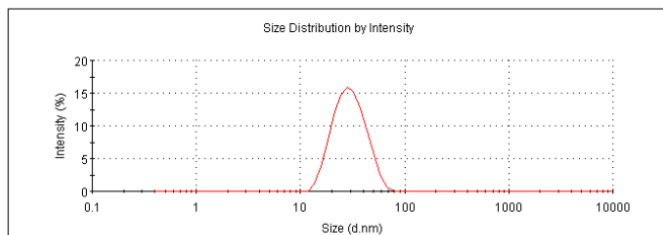

Figure S3. Optimization of micelle formulation at different feed ratios of PTX/PEG-G3-RA<sub>8</sub> (% w/w). The mean diameter and size distribution of micelles were evaluated by dynamic light scattering (DLS). Large aggregates were measured when the feed ratio reached as high as 40% and 50%.

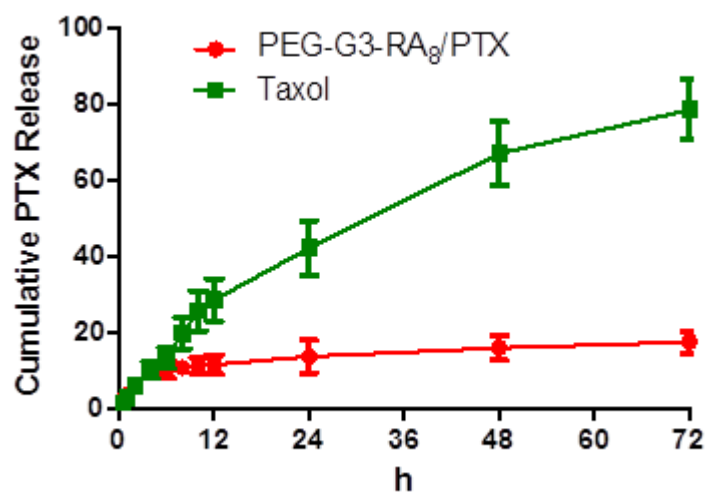

Figure S4. In vitro PTX release profiles from Taxol and PEG-G3-RA<sub>8</sub>/PTX micelles in PBS at 37 ° C. Data are represented as means  $\pm$  SD (n = 3).

10% FBS

1 h

24 h

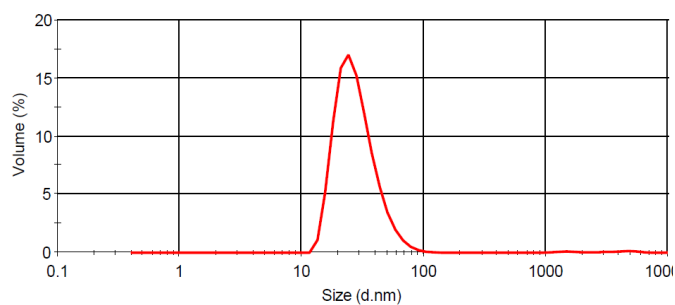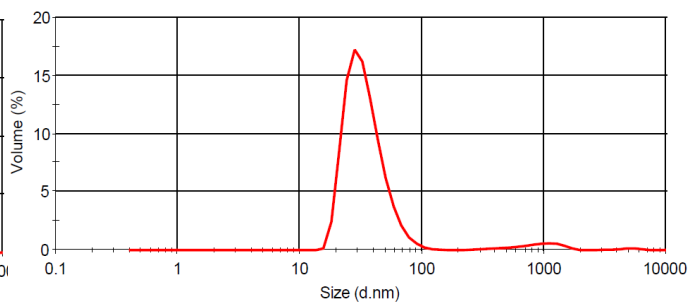

20% FBS

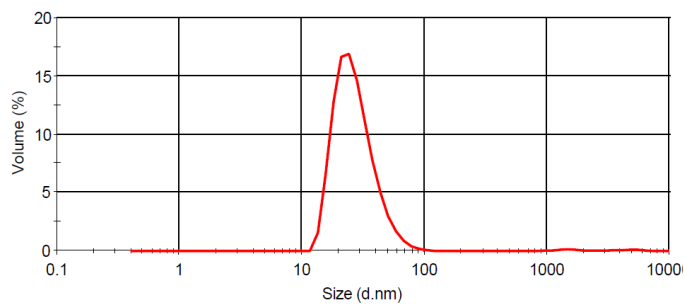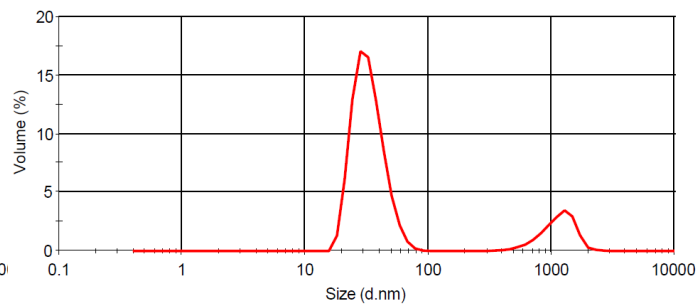

40% FBS

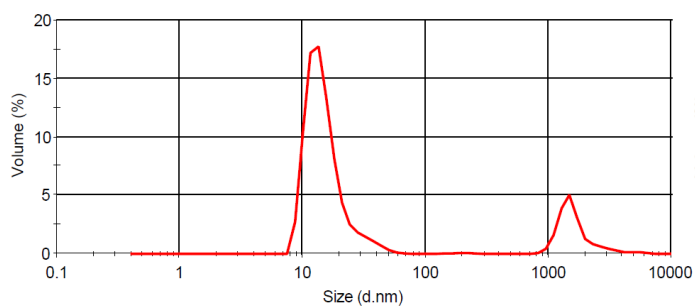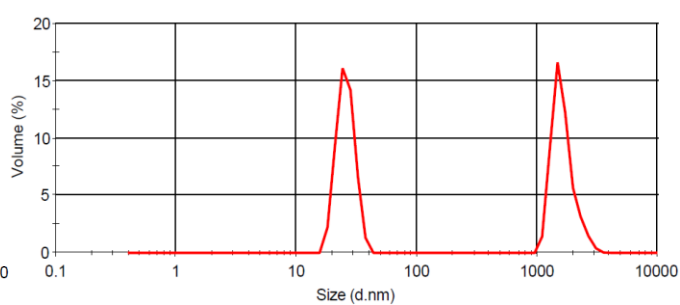

Figure S5. The stability of PEG-G3-RA<sub>6</sub>/PTX micelles incubated in different FBS solutions at 37 ° C for 1 or 24 h. The partial size was masured by DLS.

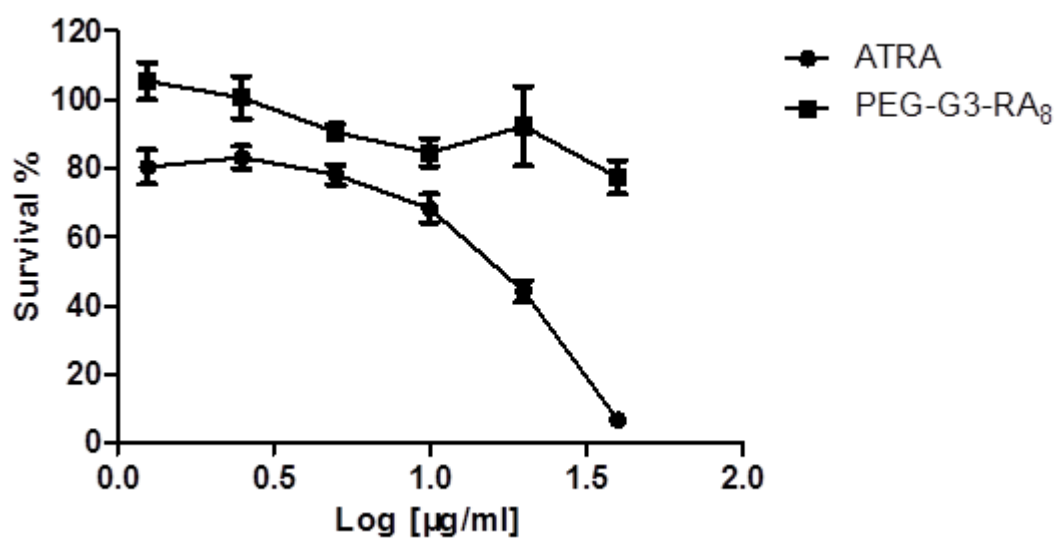

Figure S6. The cytotoxicity of ATRA and PEG-G3-RA<sub>8</sub> incubated at different concentrations for 48 h. Data were presented as mean  $\pm$  SD (n = 4).

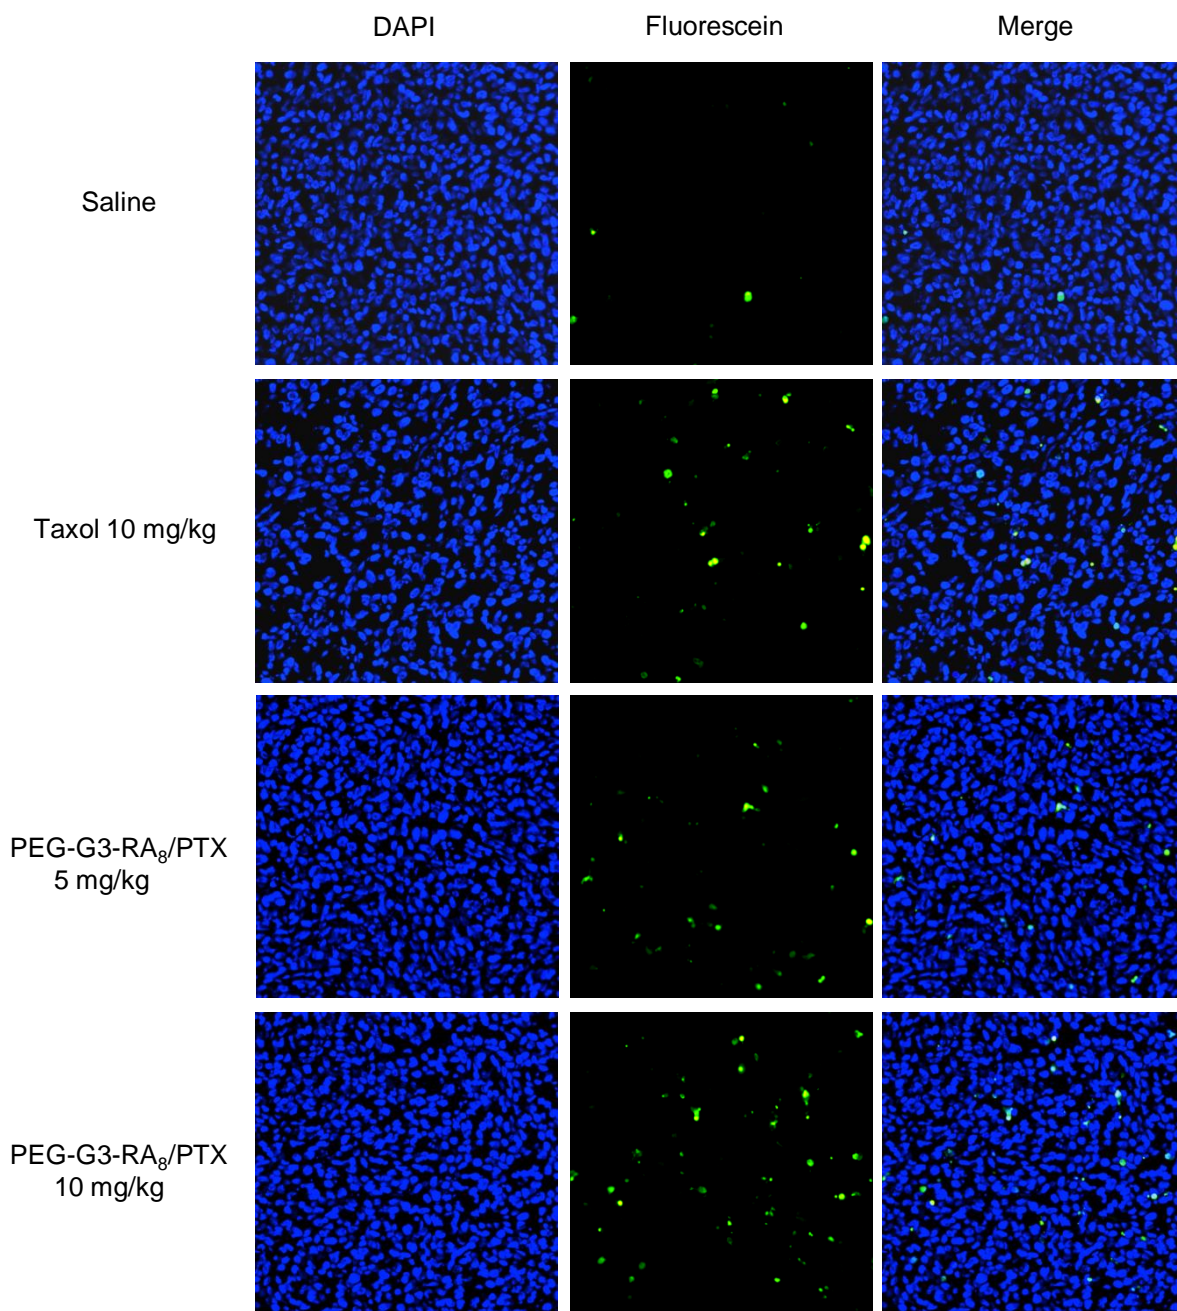

Figure S7. In vivo apoptosis. MCF-7 bearing nude mice were received i.v. injections of Taxol (10 mg/kg) and PEG-G3-RA<sub>8</sub>/PTX (5, 10 mg/kg) on days 0, 4, 8 and 12 (saline served as control). Representative histological images were shown using TUNEL assay 2 day after the treatment. The nuclei was stained by DAPI (blue), and green is fluorescein labeled dUTP which indicating the apoptosis cells. The PEG-G3-RA<sub>8</sub>/PTX 10 mg/kg treated group induced most significant apoptosis.



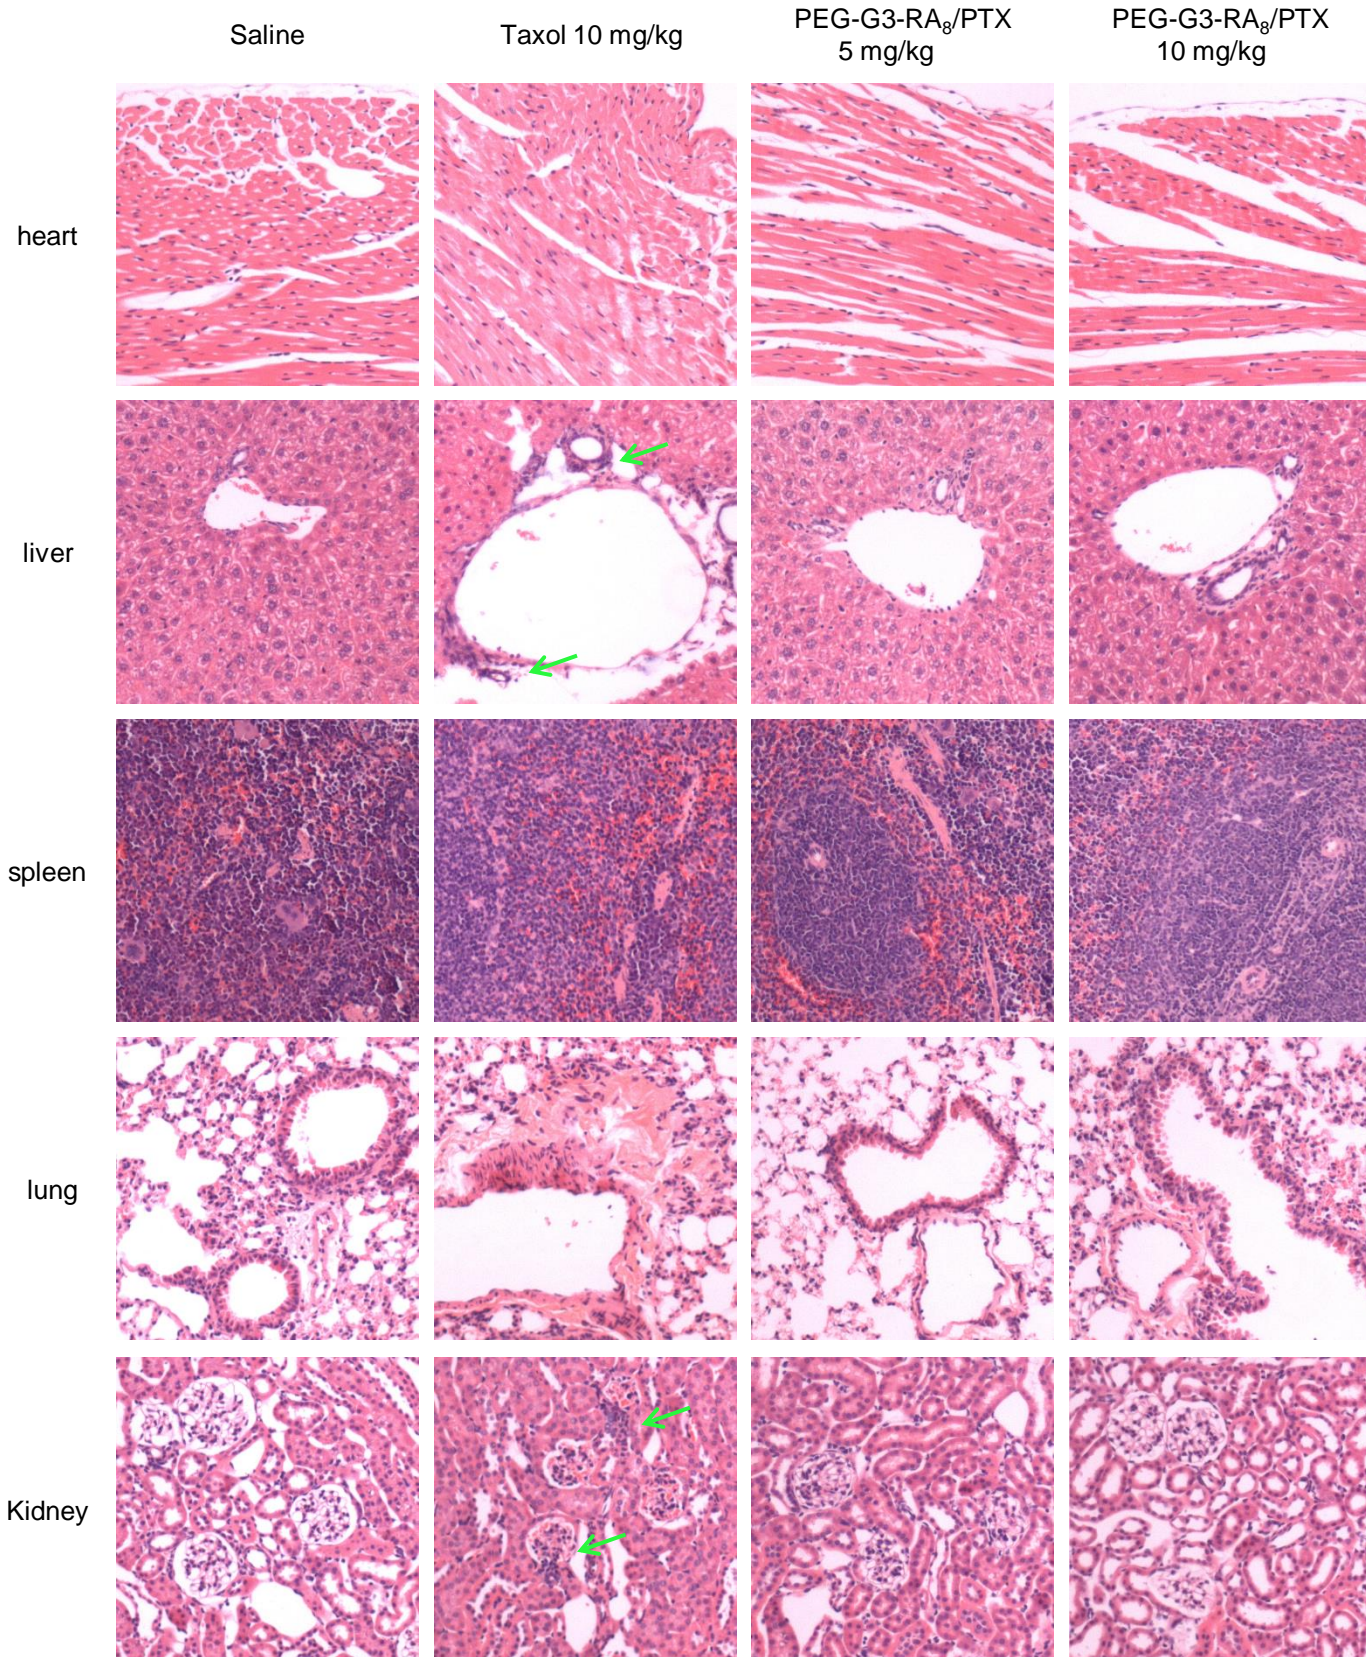

Figure S8. Histological analysis of heart, liver, spleen, lung, kidney sections stained with hematoxylin and eosin after the same treatment in the apoptosis study. As compared to saline treated group, there were no histological evidence of side effects in any of the micelle treated groups. While, there were some inflammatory infiltrations in the liver and kidney of PTX treated group (green arrows).
